# Supplementary material for: Polyacylated Anthocyanins in Bluish-Purple Petals of Chinese Bellflower, Platycodon grandiflorum
Source: PubMed Central journal article supplement (PMC8070928; doi:10.3390/ijms22084044), 2021-04-14
Supplement: ijms-22-04044-s001.pdf [file ijms-22-04044-s001.pdf]

Supporting Information

## Polyacylated anthocyanins in bluish-purple petals of Chinese bellflower, *Platycodon grandiflorum*

Tadao Kondo <sup>1</sup>, Seiji Hagihara <sup>1</sup>, Yoshiaki Takaya <sup>2</sup> and Kumi Yoshida <sup>1,\*</sup>

<sup>1</sup> Graduate School of Informatics, Nagoya University, Chikusa, Nagoya 464-8601

kondot@info.human.nagoya-u.ac.jp, hagihara.seiji@j.mbox.nagoya-u.ac.jp

<sup>2</sup> Faculty of Pharmacy, Meijo University, 150 Yagotoyama, Tenpaku, Nagoya 468-8503, Japan

ytakaya@meijo-u.ac.jp

\* Correspondence: yoshidak@i.nagoya-u.ac.jp; Tel.: +81-052-789-5638

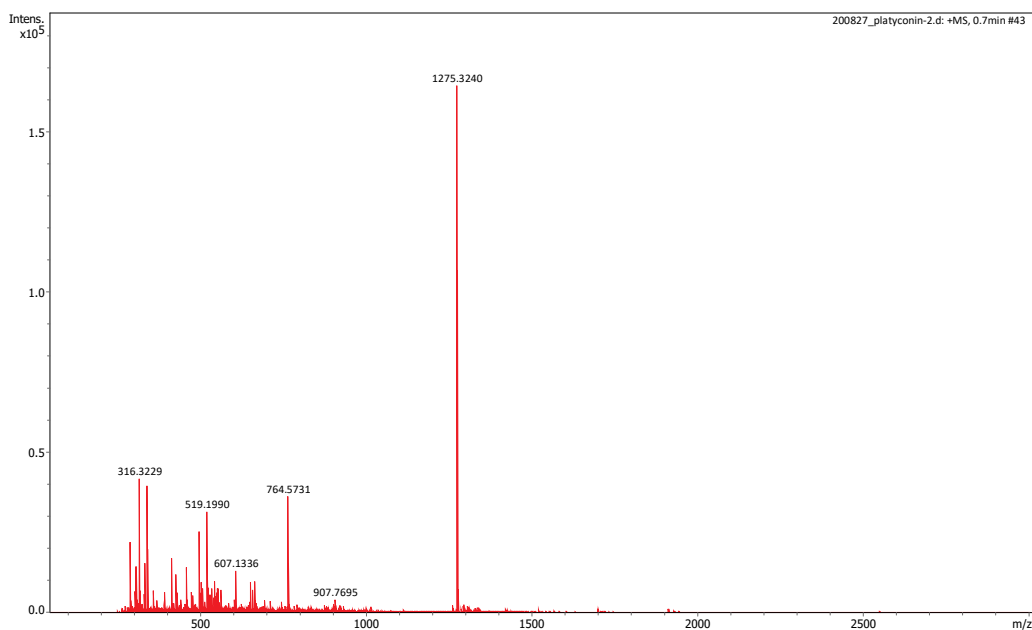

Figure S1. HR-MS of 5.

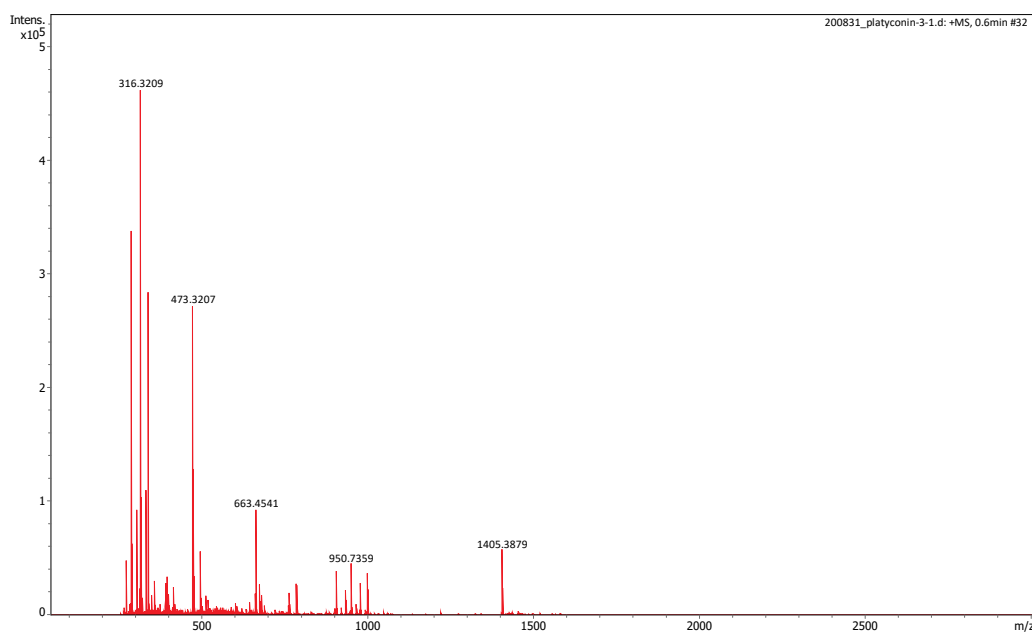

Figure S2. HR-MS of 6.

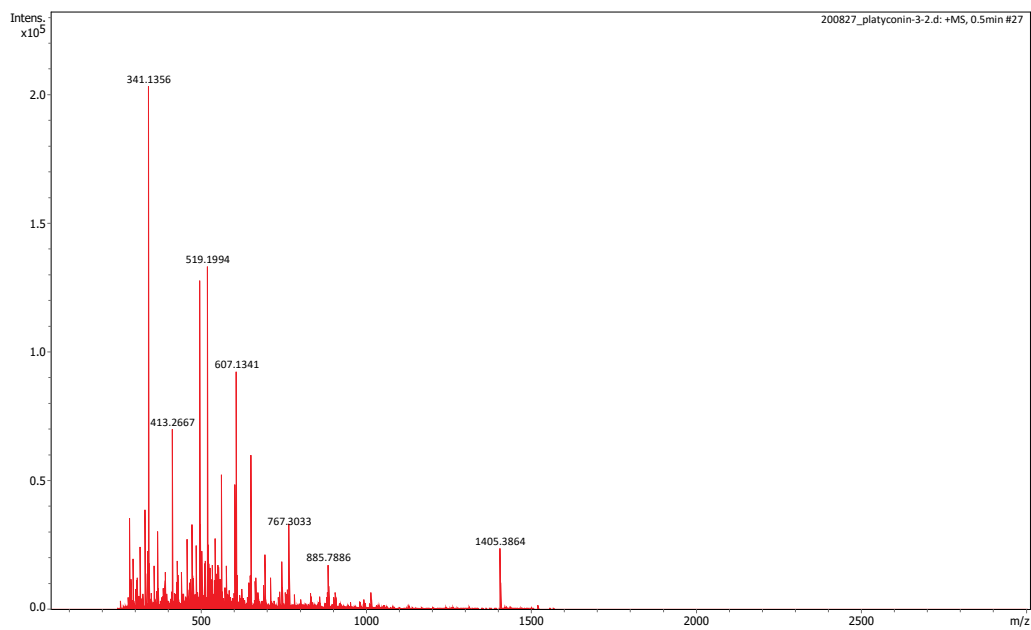

Figure S3. HR-MS of 7.

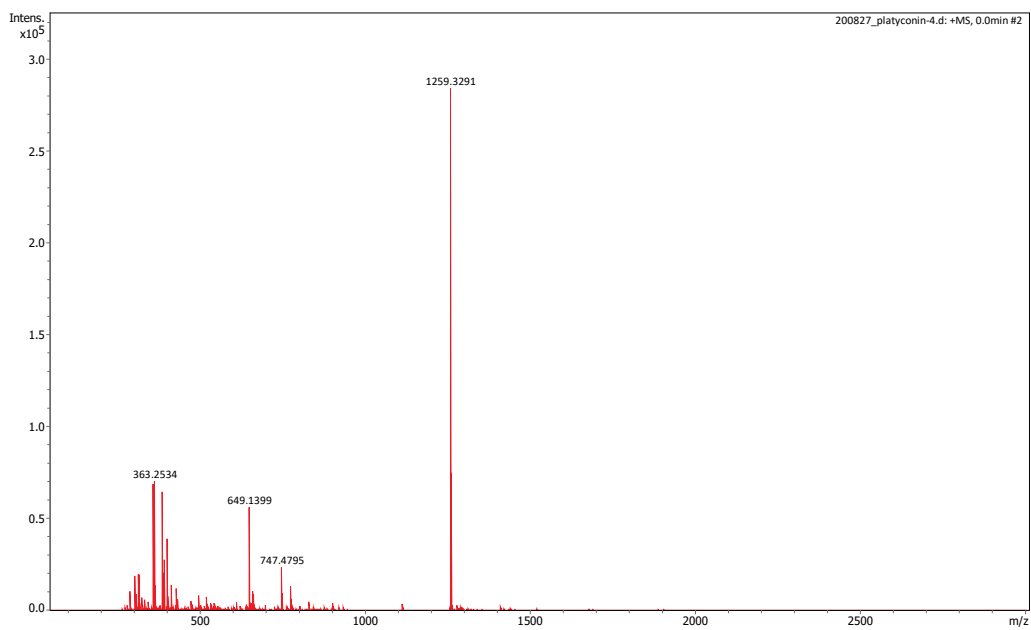

Figure S4. HR-MS of 8.

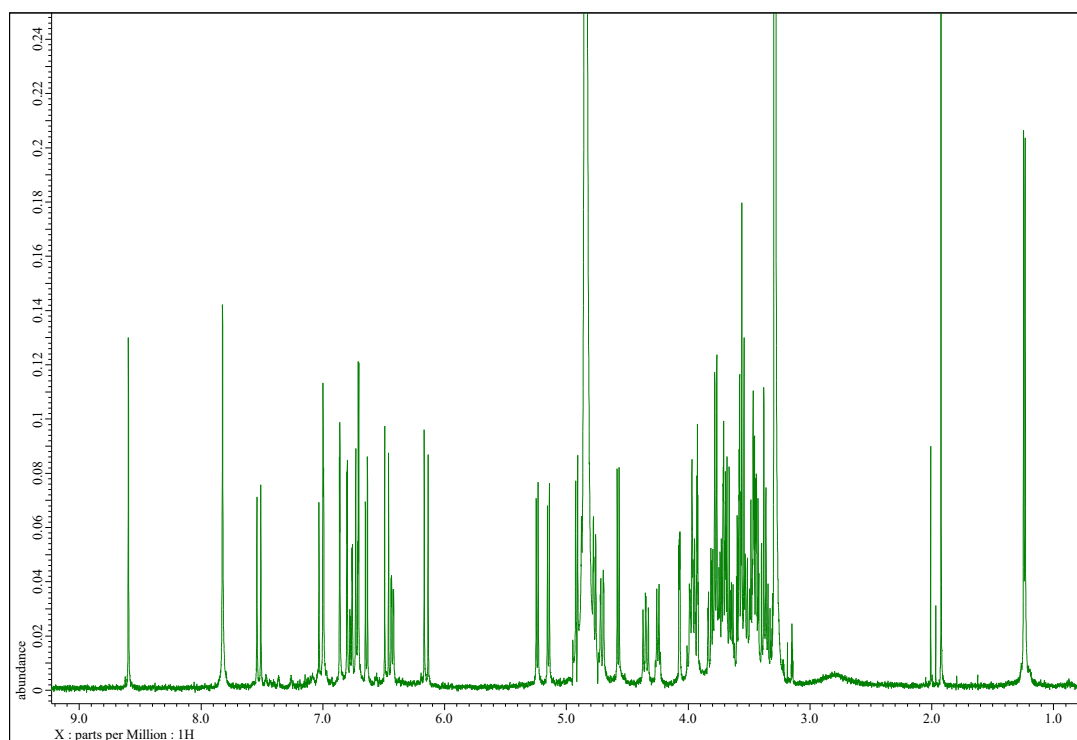

**Figure S5.**  $^1\text{H}$  NMR spectrum of **1** ( $^1\text{H}$ : 500 MHz, 5% TFA- $d_3$ OD, rt).

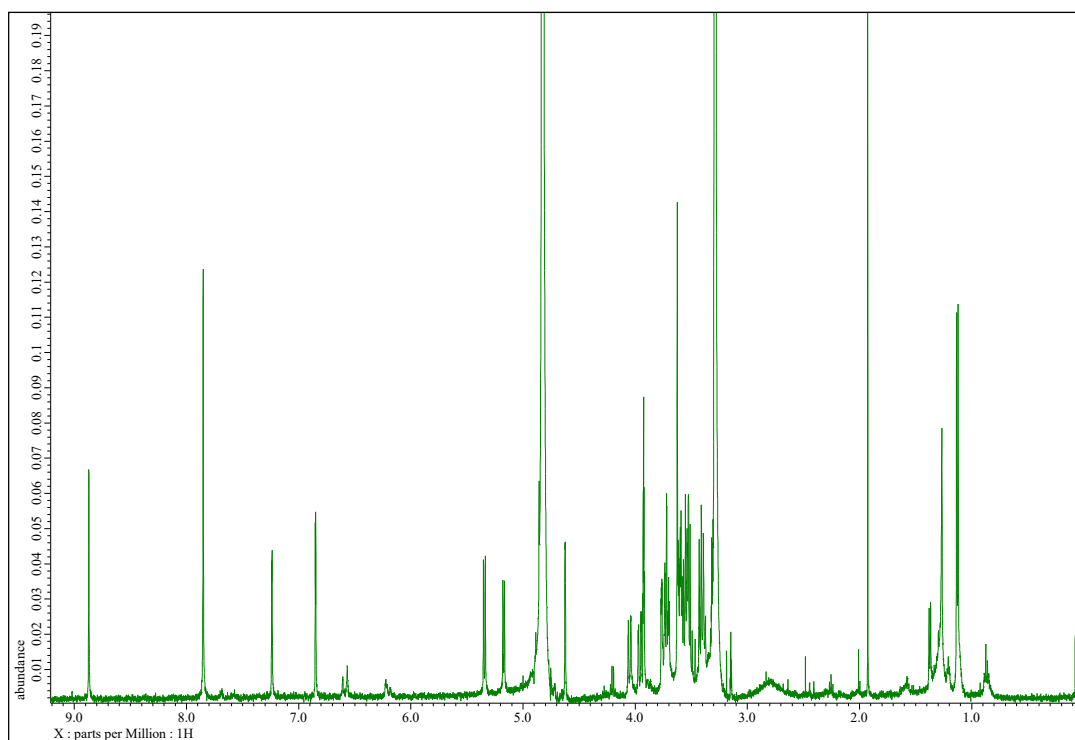

**Figure S6.**  $^1\text{H}$  NMR spectrum of **2** ( $^1\text{H}$ : 500 MHz, 5% TFA- $d_3$ OD, rt).

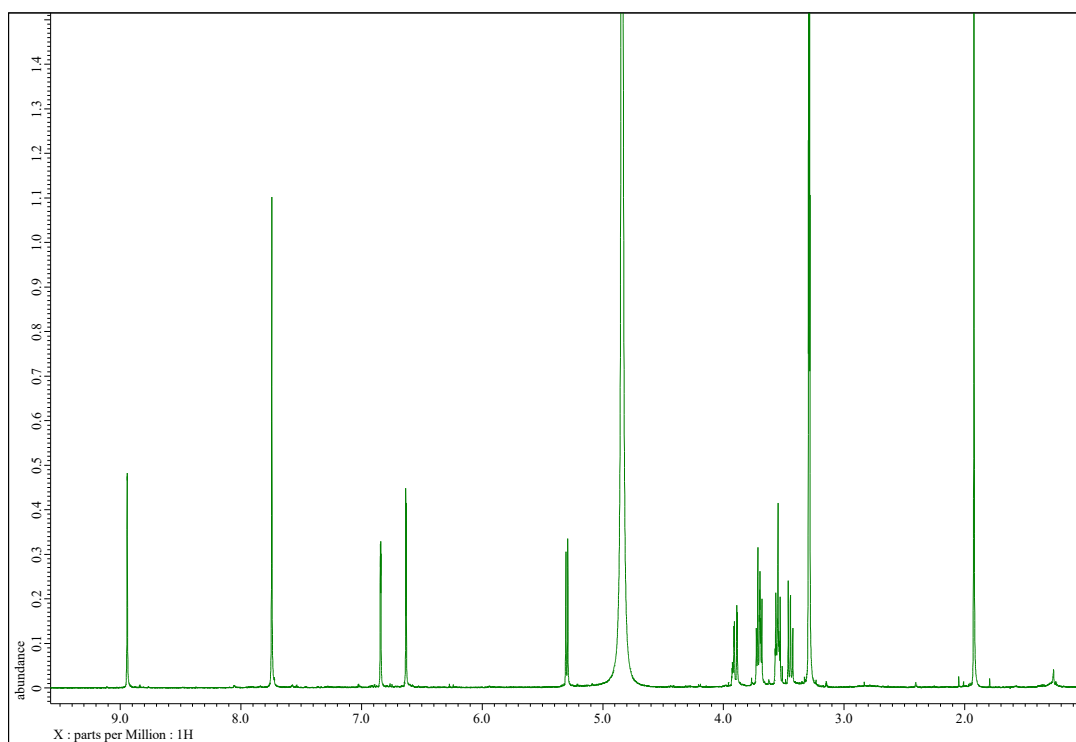

**Figure S7.**  $^1\text{H}$  NMR spectrum of **3** ( $^1\text{H}$ : 500 MHz, 5% TFA- $d$ - $\text{CD}_3\text{OD}$ , rt).

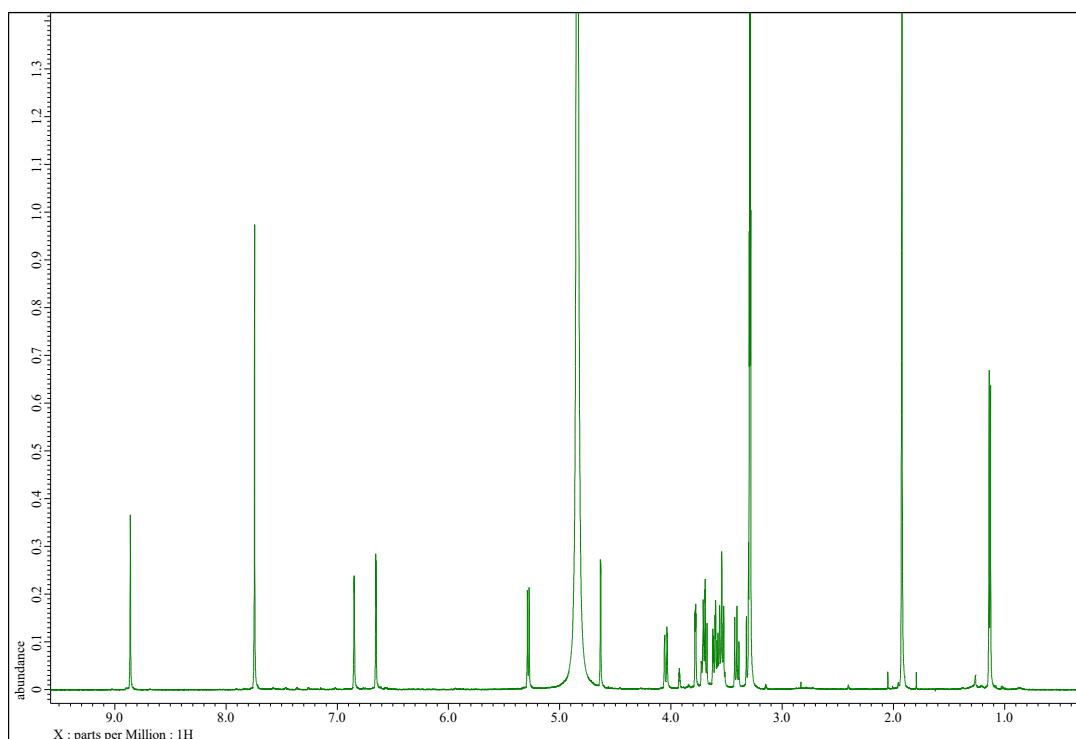

**Figure S8.**  $^1\text{H}$  NMR spectrum of **4** ( $^1\text{H}$ : 500 MHz, 5% TFA- $d$ - $\text{CD}_3\text{OD}$ , rt).

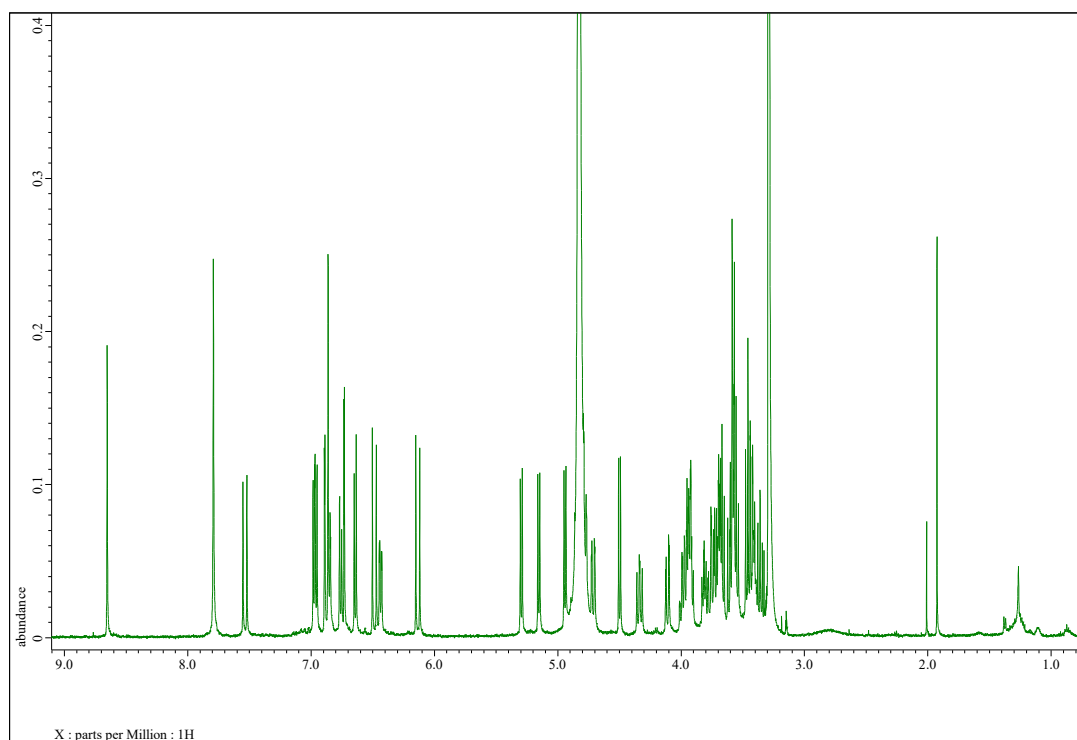

**Figure S9.**  $^1\text{H}$  NMR spectrum of **5** ( $^1\text{H}$ : 500 MHz, 5% TFA- $d_3$ - $\text{CD}_3\text{OD}$ , rt).

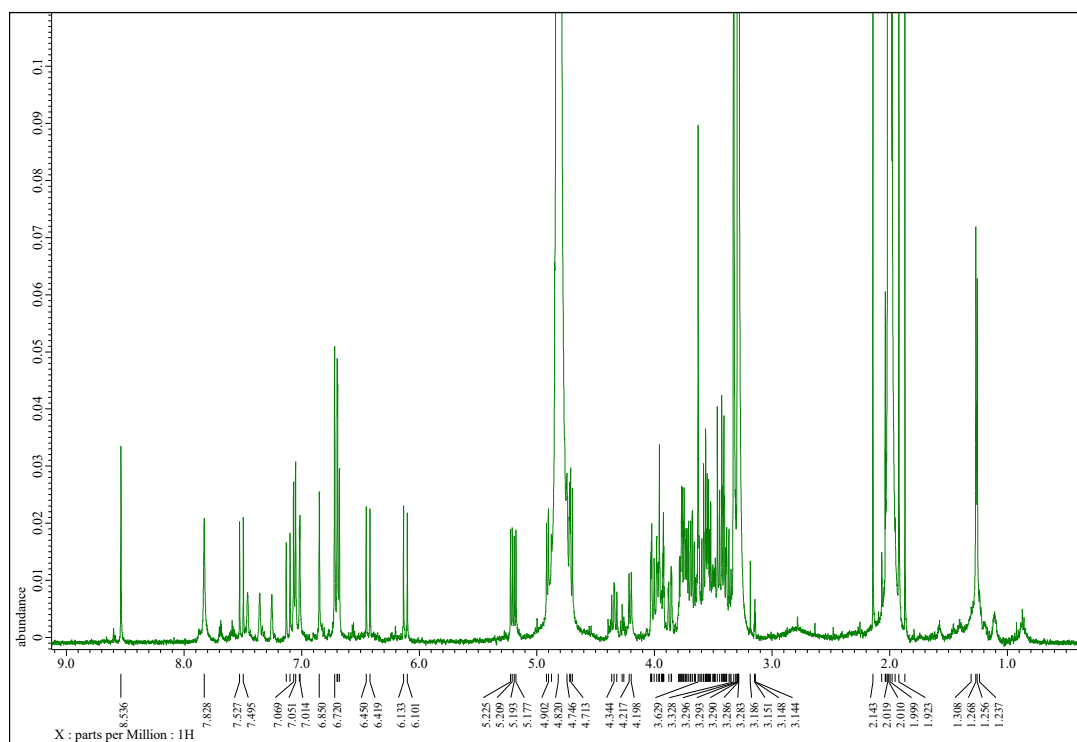

**Figure S10.**  $^1\text{H}$  NMR spectrum of **6** ( $^1\text{H}$ : 500 MHz, 5% TFA- $d_3$ - $\text{CD}_3\text{OD}$ , rt).

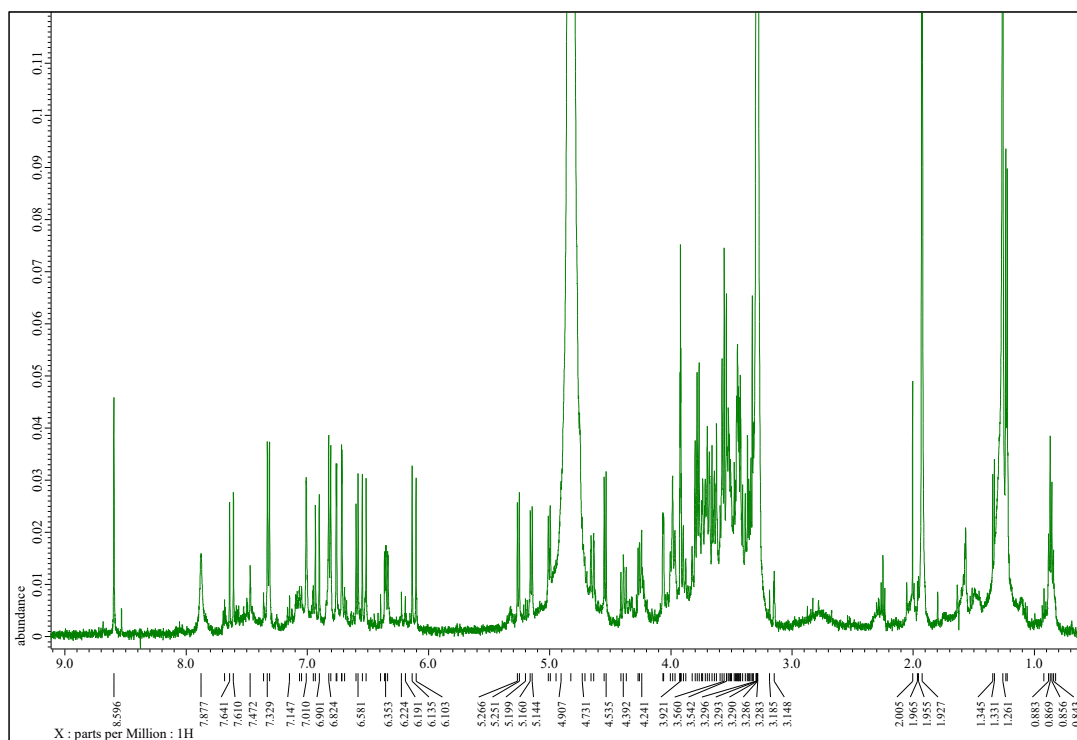

Figure S11.  $^1\text{H}$  NMR spectrum of 7 ( $^1\text{H}$ : 500 MHz, 5% TFA*d*- $\text{CD}_3\text{OD}$ , rt).

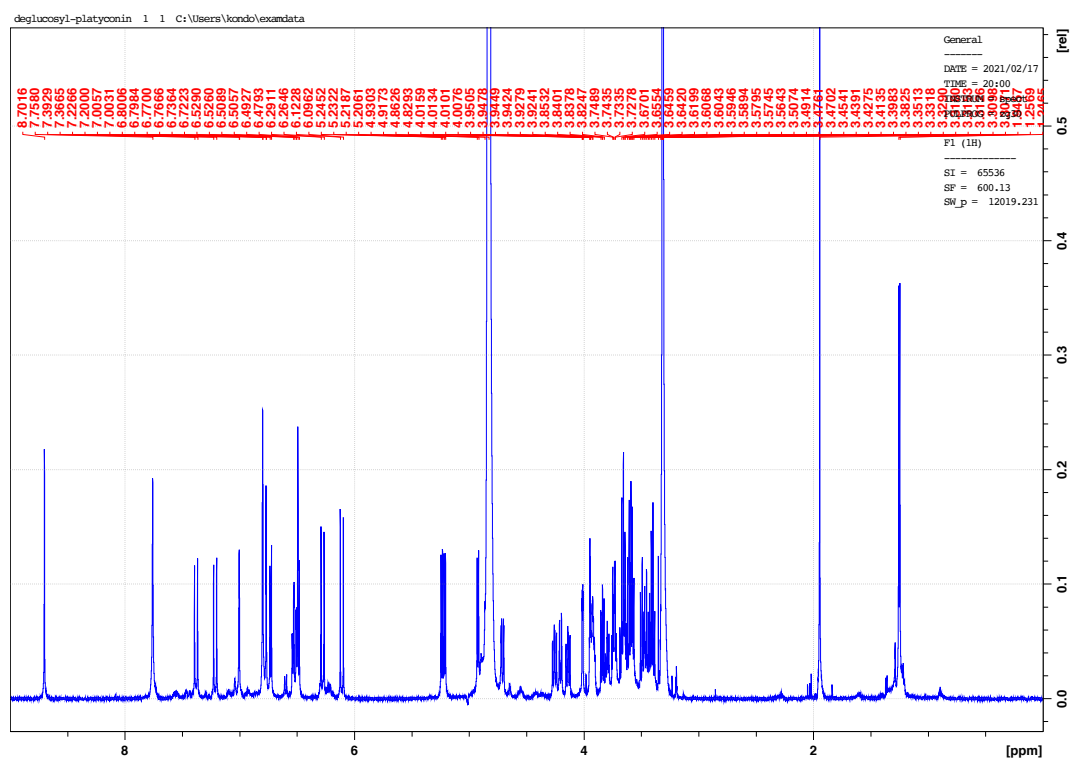

Figure S12.  $^1\text{H}$  NMR spectrum of 8 ( $^1\text{H}$ : 500 MHz, 5% TFA*d*- $\text{CD}_3\text{OD}$ , rt).

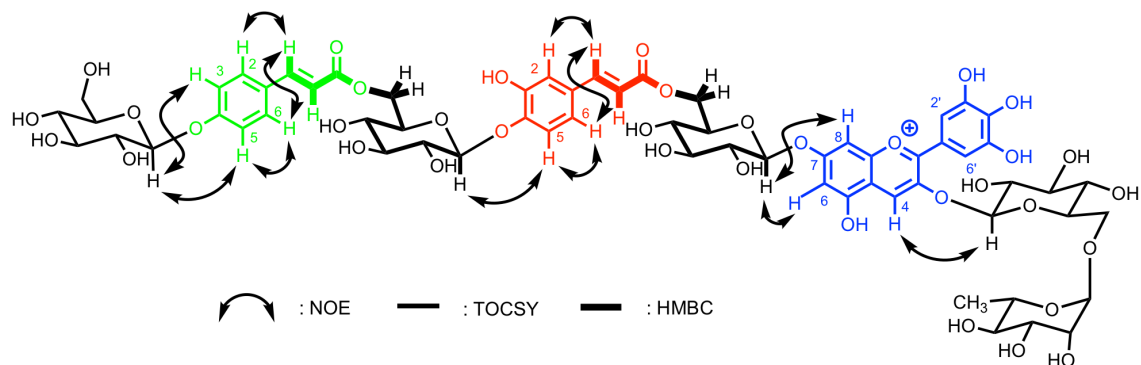

**Figure S13.** Strategy of structural determination of **6**. Attaching positions of glucose were determined by NOE correlations indicated by double-edged arrow, the signals of sugar were assigned by using 1D-TOCSY correlations, and the attachment between sugar and acyl moiety was determined by using HMBC correlation. The same procedure was applied to determine the structure of **7** and other diacylated anthocyanins.
